# Supplementary material for: Calcium Signaling in T Cells Is Induced by Binding to Nickel-Chelating Lipids in Supported Lipid Bilayers
Source: Frontiers journal article supplement (doi:10.3389/fphys.2020.613367), 2021-01-21
Supplement: Data_Sheet_1.pdf [file Data_Sheet_1.pdf]

*Supplementary Material*

**Calcium Signaling in T Cells Is Induced by Binding to Nickel-Chelating Lipids in Supported Lipid Bilayers**

**Tommy Dam<sup>1</sup>, Victoria Junghans<sup>1</sup>, Jane Humphrey<sup>2</sup>, Manto Chouliara<sup>1</sup>, Peter Jönsson<sup>1</sup>**

<sup>1</sup>Department of Chemistry, Lund University, Lund, Sweden

<sup>2</sup>Department of Chemistry, University of Cambridge, Cambridge, UK

**\* Correspondence:**

Corresponding Author

peter.jonsson@fkem1.lu.se

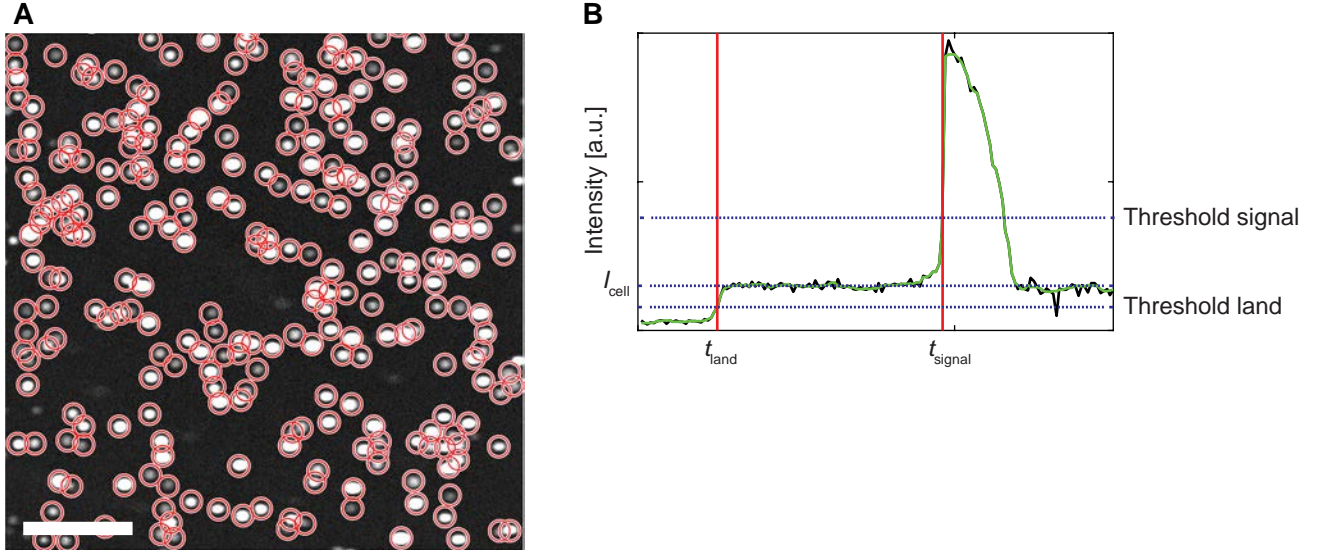

**Supplementary Figure 1.** The signaling fraction and signaling time was determined using a custom-written MATLAB script. **(A)** Image showing bound and detected cells. Each red circle corresponds to one detected cell. The scale bar is 100  $\mu\text{m}$ . **(B)** Intensity profile from one detected cell in A at different image frames (black line: raw data, green line: moving median-filtered data). The cell landed at  $t_{\text{land}}$  and signaled at  $t_{\text{signal}}$ , defined by the intensity increasing above “Threshold land” and “Threshold signal”, respectively. The first of these thresholds is user set, whereas the second is given by  $2.5 \times I_{\text{cell}}$ , where  $I_{\text{cell}}$  is the intensity of the non-signaling cell.

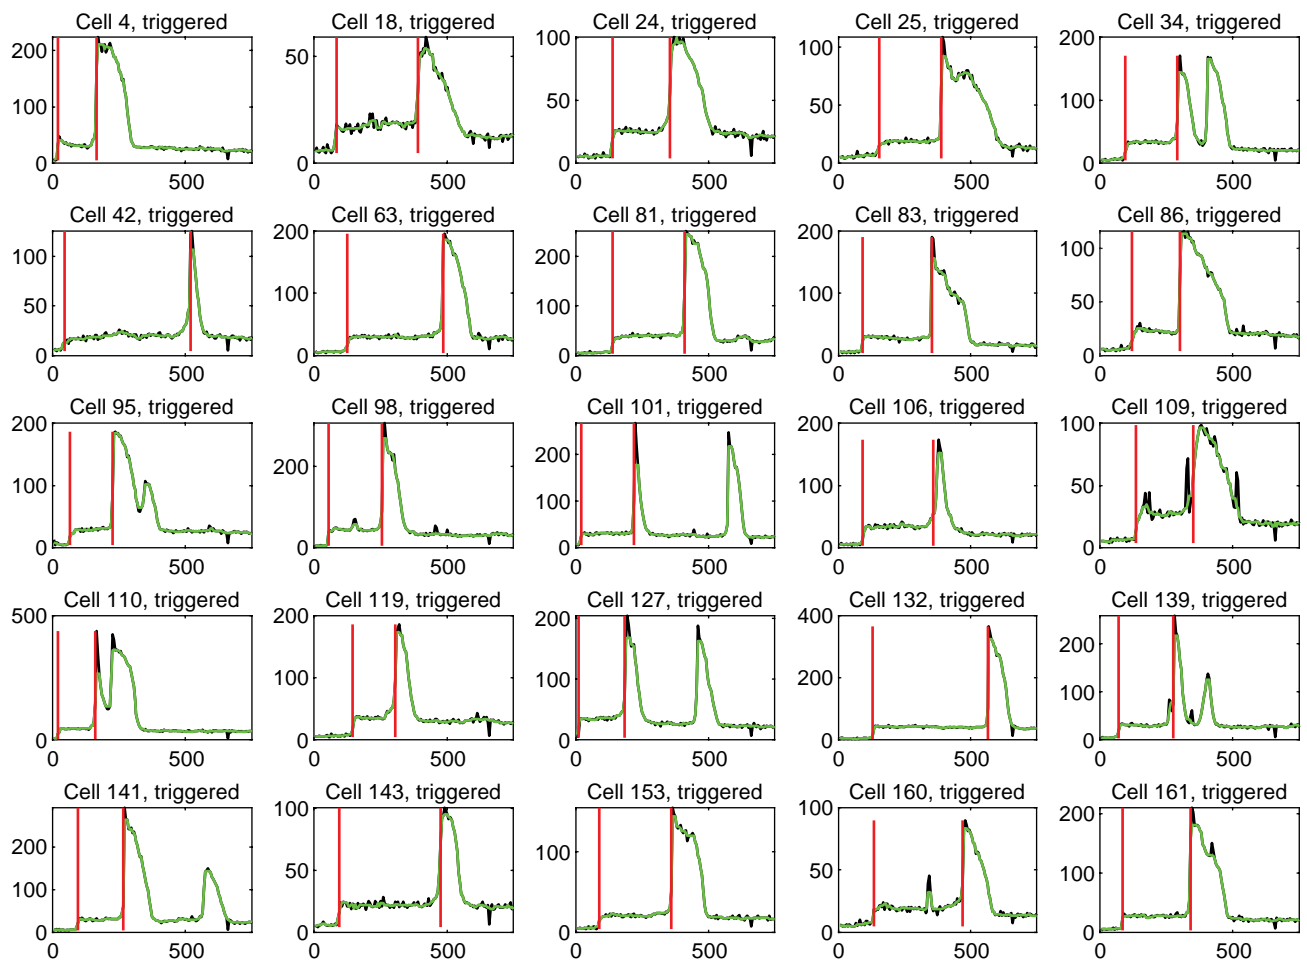

**Supplementary Figure 2.** Examples of intensity traces for different signaling cells (black line: raw data, green line: moving median-filtered data). The first red line corresponds to the time when the cell lands and the second red line the time when the cell signals. The y-axis shows the intensity in arbitrary units and the x-axis the time in seconds.

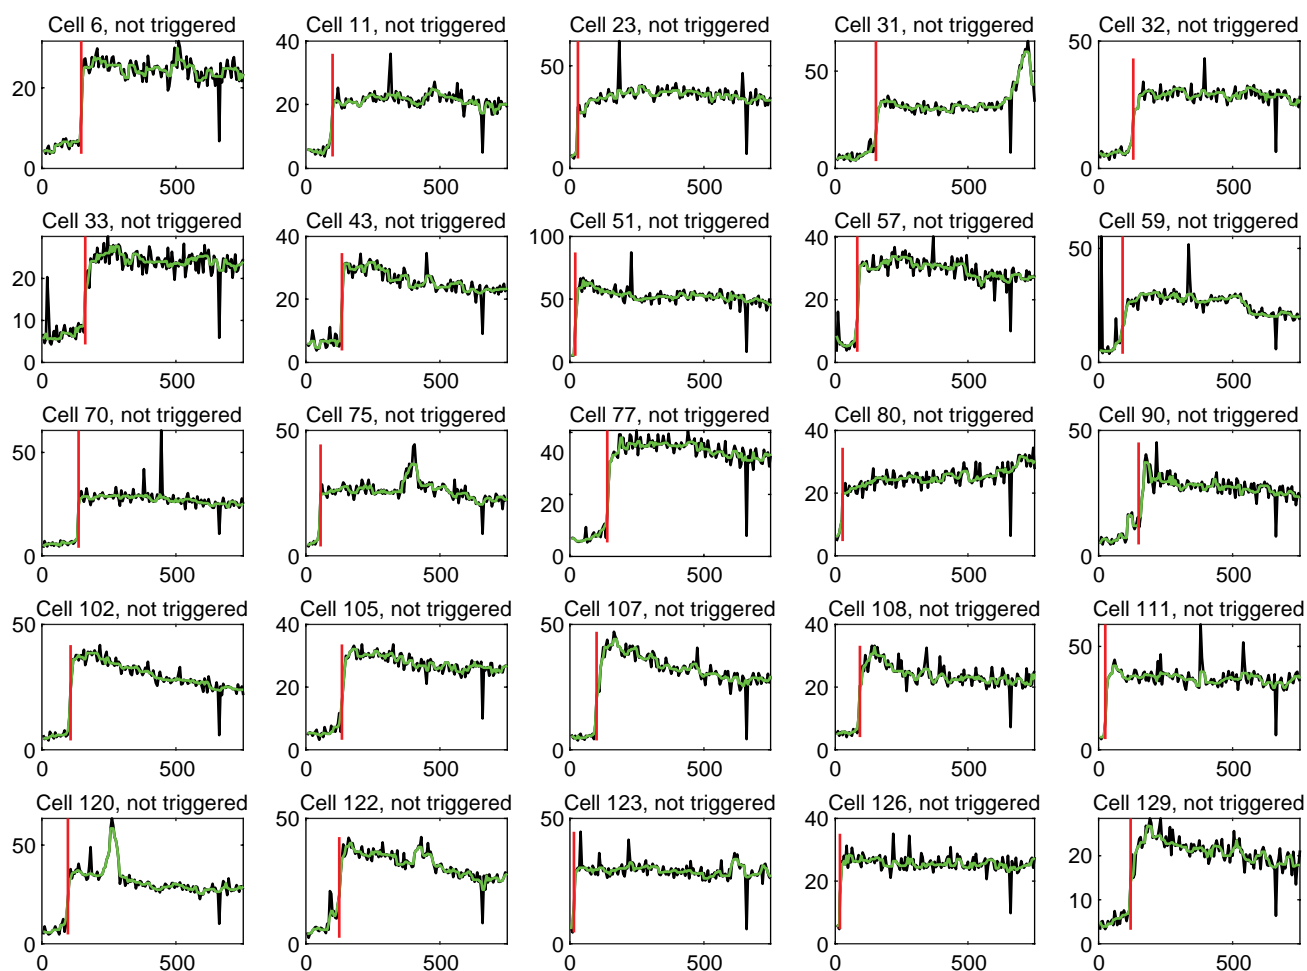

**Supplementary Figure 3.** Examples of intensity traces for different non-signaling cells (black line: raw data, green line: moving median-filtered data). The red line corresponds to the time when the cell lands. The y-axis shows the intensity in arbitrary units and the x-axis the time in seconds.

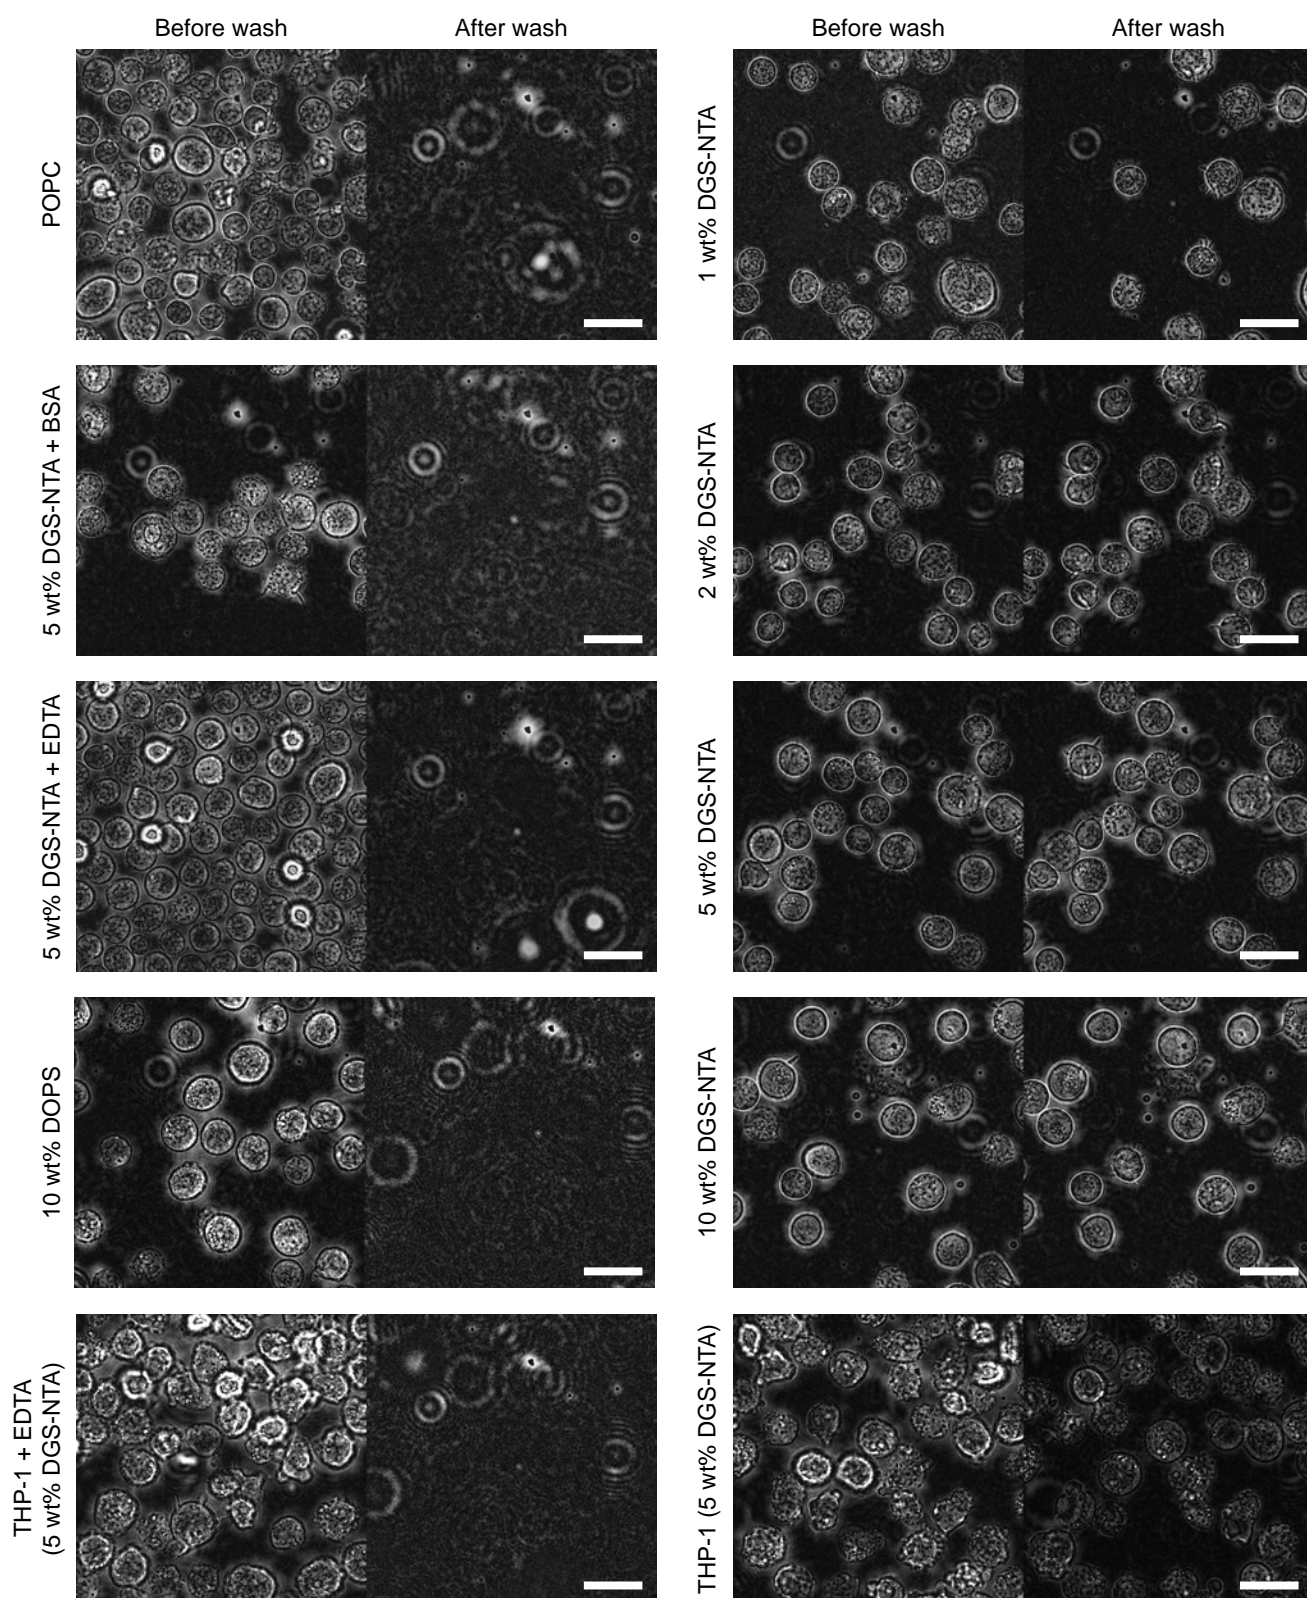

**Supplementary Figure 4.** Cells attach to SLBs containing  $\geq 2$  wt% DGS-NTA. The figures show bright field images before (*left*) and after (*right*) washing for different SLB systems. All cells are Jurkat T cells except the lowest row which are THP-1 cells. The scale bar is 20  $\mu\text{m}$  in all images.

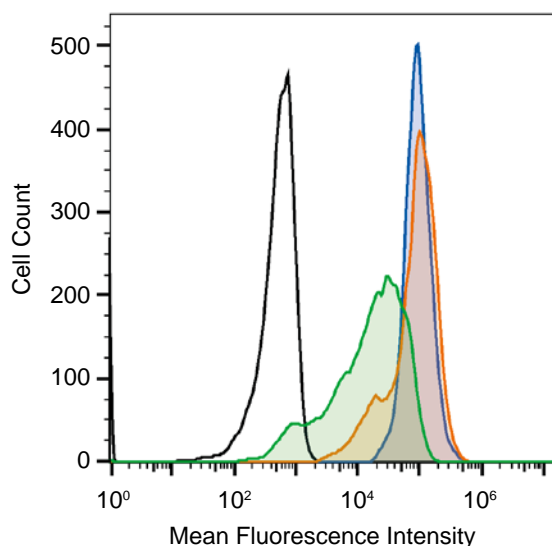

**Supplementary Figure 5.** Cell surface expression of CD3, CD48 and CD45. Mean fluorescence intensity of the isotype PE  $\alpha$ -mouse IgG1 (black line), PE  $\alpha$ -human CD3 (green line), PE  $\alpha$ -rat CD48 (orange line) and PE  $\alpha$ -human CD45 (blue line). Quantibrite analysis was used to convert the intensity to an average number of molecules per cell: CD3 = 7 700 molecules per cell (TCR = CD3/2 = 3 900 molecules per cell), CD45 = 59 000 molecules per cell and CD48 = 47 000 molecules per cell.

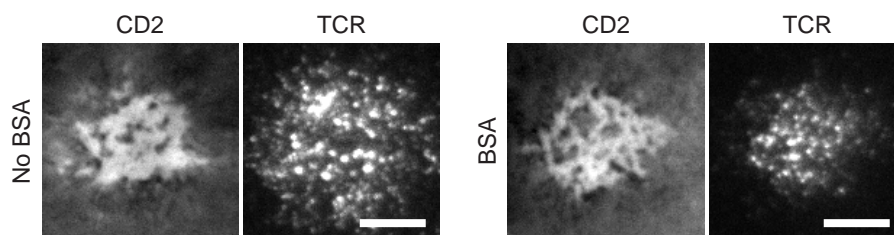

**Supplementary Figure 6.** Fluorescence images of representative cell-SLB contacts in the CD2 and the TCR channel without (*left*) and with (*right*) BSA blocking. The SLBs contained 10 wt% DGS-NTA(Ni) and had  $\sim 700$  CD2 molecules per  $\mu\text{m}^2$ . The scale bar is 5  $\mu\text{m}$ .

## Supplementary Movie Legends

**Supplementary Movie 1.** Fluo4-AM fluorescence signal for Jurkat T cells binding to a ligand-free SLB containing 2 wt% DGS-NTA(Ni). The entire movie is 750 seconds long and the scale bar is 50  $\mu\text{m}$ .

**Supplementary Movie 2.** Fluo4-AM fluorescence signal for Jurkat T cells binding to a ligand-free SLB containing 5 wt% DGS-NTA(Ni). The entire movie is 750 seconds long and the scale bar is 50  $\mu\text{m}$ .

**Supplementary Movie 3.** Fluo4-AM fluorescence signal for Jurkat T cells binding to a ligand-free SLB containing 10 wt% DGS-NTA(Ni). The entire movie is 750 seconds long and the scale bar is 50  $\mu\text{m}$ .

**Supplementary Movie 4.** Fluo4-AM fluorescence signal for Jurkat T cells binding to an OKT3-coated glass slide. The entire movie is 750 seconds long and the scale bar is 50  $\mu\text{m}$ .

**Supplementary Movie 5.** Fluo4-AM fluorescence signal for Jurkat T cells binding to a 5 wt% DGS-NTA(Ni) SLB functionalized with 322 CD2 molecules per  $\mu\text{m}^2$ . The entire movie is 750 seconds long and the scale bar is 50  $\mu\text{m}$ .

**Supplementary Movie 6.** Fluo4-AM fluorescence signal for Jurkat T cells binding to a 10 wt% DGS-NTA(Ni) SLB functionalized with 1236 CD2 molecules per  $\mu\text{m}^2$ . The entire movie is 750 seconds long and the scale bar is 50  $\mu\text{m}$ .

**Supplementary Movie 7.** Fluo4-AM fluorescence signal for Jurkat T cells binding to a BSA-blocked SLB containing 10 wt% DGS-NTA(Ni) and being functionalized with 2321 CD2 molecules per  $\mu\text{m}^2$ . The entire movie is 750 seconds long and the scale bar is 50  $\mu\text{m}$ .

**Supplementary Movie 8.** Fluo4-AM fluorescence signal for Jurkat T cells binding to a 10 wt% DGS-NTA(Ni) SLB functionalized with 629 L3-12 TCR molecules per  $\mu\text{m}^2$ . The signaling fraction of cells was determined to 0.52 and the average signaling time to 220 s. The entire movie is 750 seconds long and the scale bar is 50  $\mu\text{m}$ .

**Supplementary Movie 9.** Fluo4-AM fluorescence signal for Jurkat T cells binding to a BSA-blocked SLB containing 10 wt% DGS-NTA(Ni) and being functionalized with 1930 L3-12 TCR molecules per  $\mu\text{m}^2$ . The signaling fraction of cells was determined to 0.05 and the average signaling time to 250 s. The entire movie is 750 seconds long and the scale bar is 50  $\mu\text{m}$ .
